# Supplementary material for: First-principles investigations on the functionalization of chiral and non-chiral carbon nanotubes by Diels–Alder cycloaddition reactions
Source: Royal Society of Chemistry journal article supplement (doi:10.1039/b808152b), 2008-11-04

# **First-principles investigations on the functionalization of chiral and non-chiral carbon nanotubes by Diels-Alder cycloaddition reactions**

**Francesco Mercuri\* and Antonio Sgamellotti**

## **Supporting Information**

**S1** (Pages 2-16): Cartesian coordinates and total energies of optimized structures discussed in the text

**S2** (Page 17): Molecular models of optimized structures discussed in the text

**S1:** Cartesian coordinates of optimized structures discussed in the text. The second line of the .xyz file reports the computed total energy in eV.

|               |          |           |           |   |           |           |           |
|---------------|----------|-----------|-----------|---|-----------|-----------|-----------|
| 180           |          |           |           | C | -0.010345 | -0.103940 | 3.266353  |
| -24436.312217 |          |           |           | C | -0.013973 | 1.301161  | 3.017751  |
| C             | 8.686206 | -2.168796 | 2.776449  | C | 1.237361  | 1.962611  | 2.690835  |
| C             | 8.681376 | -0.908177 | 3.364641  | C | 1.250783  | 3.048402  | 1.768913  |
| C             | 7.470116 | -0.115772 | 3.394098  | C | -0.026237 | 3.732533  | 1.287275  |
| C             | 7.471678 | 1.318117  | 3.154465  | C | -0.025630 | 3.964941  | -0.335835 |
| C             | 8.687885 | 2.049395  | 2.857008  | C | 1.250335  | 3.438693  | -0.990113 |
| C             | 8.695294 | 3.028261  | 1.870734  | C | 1.236589  | 2.640961  | -2.170703 |
| C             | 7.484055 | 3.328139  | 1.132513  | C | -0.014311 | 2.090489  | -2.661987 |
| C             | 7.484092 | 3.527810  | -0.305397 | C | -0.010641 | 0.800328  | -3.272072 |
| C             | 8.695017 | 3.437960  | -1.098127 | C | 1.239261  | 0.077795  | -3.401724 |
| C             | 8.686611 | 2.762131  | -2.312257 | C | 1.242299  | -1.346296 | -3.200610 |
| C             | 7.469605 | 2.138635  | -2.794298 | C | -0.005070 | -2.004828 | -2.876614 |
| C             | 7.466899 | 0.819913  | -3.406021 | C | -0.003985 | -3.034833 | -1.880154 |
| C             | 8.677702 | 0.048079  | -3.590407 | C | 1.248824  | -3.368774 | -1.233539 |
| C             | 8.683166 | -1.323255 | -3.356074 | C | 1.249095  | -3.569135 | 0.193029  |
| C             | 7.477587 | -1.998480 | -2.926869 | C | -0.003613 | -3.425265 | 0.906737  |
| C             | 7.483029 | -3.026827 | -1.899831 | C | -0.004670 | -2.703083 | 2.144309  |
| C             | 8.694885 | -3.439906 | -1.221405 | C | -1.254718 | -2.162039 | 2.633456  |
| C             | 8.695345 | -3.632580 | 0.155842  | C | -1.257220 | -0.842353 | 3.204383  |
| C             | 7.483603 | -3.420608 | 0.921689  | C | -2.502828 | -0.131223 | 3.307657  |
| C             | 7.479112 | -2.706311 | 2.187035  | C | -2.511717 | 1.288174  | 3.048947  |
| C             | 6.234107 | -2.145705 | 2.643936  | C | -1.271883 | 1.951155  | 2.691542  |
| C             | 6.229893 | -0.829235 | 3.249415  | C | -1.293078 | 3.031941  | 1.768092  |
| C             | 4.976288 | -0.112501 | 3.322234  | C | -2.539147 | 3.366096  | 1.147394  |
| C             | 4.977717 | 1.300499  | 3.088845  | C | -2.539080 | 3.572492  | -0.305991 |
| C             | 6.233124 | 1.949183  | 2.788050  | C | -1.292457 | 3.424478  | -0.994097 |
| C             | 6.239893 | 2.981582  | 1.767212  | C | -1.271592 | 2.630999  | -2.174349 |
| C             | 4.993522 | 3.311799  | 1.120365  | C | -2.510964 | 2.086281  | -2.696351 |
| C             | 4.993548 | 3.509937  | -0.296213 | C | -2.501986 | 0.784782  | -3.319663 |
| C             | 6.239691 | 3.368102  | -1.009482 | C | -1.256969 | 0.071187  | -3.406459 |
| C             | 6.232065 | 2.649701  | -2.271225 | C | -1.254583 | -1.352503 | -3.203716 |
| C             | 4.976166 | 2.105962  | -2.733409 | C | -2.500047 | -2.010762 | -2.895847 |
| C             | 4.974056 | 0.804744  | -3.331935 | C | -2.500803 | -3.044397 | -1.884436 |
| C             | 6.227067 | 0.093362  | -3.452170 | C | -1.256062 | -3.372104 | -1.233815 |
| C             | 6.231898 | -1.336371 | -3.215797 | C | -1.256019 | -3.572707 | 0.192709  |
| C             | 4.984204 | -1.981551 | -2.880758 | C | -2.500847 | -3.435796 | 0.907879  |
| C             | 4.988747 | -3.002640 | -1.875131 | C | -2.500478 | -2.714316 | 2.161131  |
| C             | 6.242747 | -3.326002 | -1.234732 | C | -3.744007 | -2.170839 | 2.645272  |
| C             | 6.243226 | -3.526773 | 0.201061  | C | -3.745678 | -0.859527 | 3.235105  |
| C             | 4.989929 | -3.390708 | 0.907106  | C | -4.998538 | -0.144259 | 3.332968  |
| C             | 4.985929 | -2.679136 | 2.150794  | C | -5.008040 | 1.267829  | 3.093640  |
| C             | 3.731618 | -2.148195 | 2.639997  | C | -3.762385 | 1.927392  | 2.756170  |
| C             | 3.727528 | -0.835370 | 3.225828  | C | -3.775272 | 2.969002  | 1.765116  |
| C             | 2.480896 | -0.114266 | 3.300558  | C | -5.036234 | 3.269175  | 1.114444  |
| C             | 2.480951 | 1.306276  | 3.045855  | C | -5.036190 | 3.468794  | -0.302373 |
| C             | 3.727631 | 1.954348  | 2.754850  | C | -3.775000 | 3.359469  | -1.009751 |
| C             | 3.733326 | 2.999427  | 1.768650  | C | -3.761801 | 2.624683  | -2.245611 |
| C             | 2.494920 | 3.389395  | 1.150197  | C | -5.007165 | 2.078404  | -2.747767 |
| C             | 2.495121 | 3.594625  | -0.302475 | C | -4.997292 | 0.778980  | -3.350118 |
| C             | 3.733171 | 3.387771  | -1.004362 | C | -3.744658 | 0.062820  | -3.442107 |
| C             | 3.726869 | 2.648160  | -2.236402 | C | -3.743150 | -1.357574 | -3.218501 |
| C             | 2.479675 | 2.101977  | -2.688558 | C | -4.995381 | -2.004289 | -2.888814 |
| C             | 2.479535 | 0.798811  | -3.309109 | C | -4.997437 | -3.019842 | -1.877477 |
| C             | 3.725467 | 0.082394  | -3.427830 | C | -3.747423 | -3.360567 | -1.231670 |
| C             | 3.729903 | -1.338727 | -3.208941 | C | -3.747635 | -3.560810 | 0.192731  |
| C             | 2.489395 | -1.999650 | -2.891631 | C | -4.997946 | -3.409879 | 0.906060  |
| C             | 2.492538 | -3.036142 | -1.883257 | C | -4.996506 | -2.705740 | 2.154165  |
| C             | 3.739954 | -3.349462 | -1.230630 | C | -6.247073 | -2.182181 | 2.651499  |
| C             | 3.740437 | -3.548963 | 0.193729  | C | -6.248590 | -0.867988 | 3.262466  |
| C             | 2.493534 | -3.426588 | 0.908223  | C | -7.492689 | -0.161773 | 3.409138  |
| C             | 2.490645 | -2.701216 | 2.159109  | C | -7.502371 | 1.270650  | 3.161409  |
| C             | 1.243259 | -2.154901 | 2.631798  | C | -6.267789 | 1.906428  | 2.789048  |
| C             | 1.240196 | -0.834574 | 3.201321  | C | -6.281036 | 2.931265  | 1.760990  |
|               |          |           |           | C | -7.527213 | 3.267097  | 1.124348  |
|               |          |           |           | C | -7.527059 | 3.468694  | -0.313693 |
|               |          |           |           | C | -6.280823 | 3.320807  | -1.017676 |
|               |          |           |           | C | -6.267256 | 2.612373  | -2.284672 |





|   |           |           |           |   |            |           |           |
|---|-----------|-----------|-----------|---|------------|-----------|-----------|
| C | 6.829062  | 1.420677  | -3.344218 | C | -1.796637  | 1.341681  | -3.320231 |
| C | 8.265106  | 1.441361  | -3.364516 | C | -0.365729  | 1.344400  | -3.320246 |
| C | 4.676886  | 0.171717  | -3.633542 | C | -3.953643  | 0.137112  | -3.659340 |
| C | 6.108927  | 0.186872  | -3.617941 | C | -2.519754  | 0.132248  | -3.661228 |
| C | 6.835235  | -1.036787 | -3.426305 | C | -1.796969  | -1.112420 | -3.544400 |
| C | 8.280577  | -1.025343 | -3.421067 | C | -0.355393  | -1.110292 | -3.540321 |
| C | 4.691589  | -2.201020 | -2.955988 | C | -3.957107  | -2.233097 | -2.999390 |
| C | 6.123214  | -2.184335 | -2.932558 | C | -2.521540  | -2.239711 | -3.004631 |
| C | 6.854821  | -3.063491 | -2.036029 | C | -1.795632  | -3.099779 | -2.087062 |
| C | 3.965784  | -3.076722 | -2.054412 | C | -4.683481  | -3.084103 | -2.075002 |
| C | 0.362960  | -3.568996 | -0.925799 | C | -8.276992  | -3.492061 | -0.884154 |
| C | 1.803994  | -3.565451 | -0.917059 | C | -6.831498  | -3.494793 | -0.892841 |
| C | 2.521282  | -3.613221 | 0.337072  | C | -6.106611  | -3.610567 | 0.344735  |
| C | 3.954306  | -3.614705 | 0.347551  | C | -4.675530  | -3.616812 | 0.333062  |
| C | 0.358960  | -3.190238 | 1.509442  | C | -8.268495  | -3.253202 | 1.575473  |
| C | 1.795028  | -3.203968 | 1.522904  | C | -6.830250  | -3.264597 | 1.555698  |
| C | 2.508219  | -2.441939 | 2.513414  | C | -6.110394  | -2.486443 | 2.532664  |
| C | 3.948126  | -2.455632 | 2.531193  | C | -4.666389  | -2.461750 | 2.511827  |
| C | 0.356057  | -1.340820 | 3.145284  | C | -8.274508  | -3.492579 | 3.268039  |
| C | 1.786482  | -1.382776 | 3.188760  | C | -6.837701  | -1.460996 | 3.238370  |
| C | 2.513909  | -0.187736 | 3.532610  | C | -6.120789  | -0.227497 | 3.512937  |
| C | 3.954680  | -0.202487 | 3.553068  | C | -4.682282  | -0.203111 | 3.509844  |
| C | 0.366901  | 1.104502  | 3.515100  | C | -8.294016  | 0.977495  | 3.360787  |
| C | 1.801422  | 1.063621  | 3.491703  | C | -6.851325  | 0.992895  | 3.372119  |
| C | 2.545464  | 2.208592  | 2.994105  | C | -6.136477  | 2.165218  | 2.919493  |
| C | 3.962437  | 2.183384  | 2.960582  | C | -4.720949  | 2.198079  | 2.970652  |
| C | 0.369816  | 3.064245  | 2.107570  | C | -8.301277  | 3.025495  | 1.986139  |
| C | 1.795055  | 3.044696  | 2.053194  | C | -6.867737  | 3.028850  | 1.998476  |
| C | 2.508589  | 3.433356  | 0.862094  | C | -6.130088  | 3.461897  | 0.840279  |
| C | 3.952729  | 3.450209  | 0.847663  | C | -4.681111  | 3.441589  | 0.856623  |
| C | 0.349880  | 3.410659  | -0.343080 | C | -8.274236  | 3.564944  | -0.428415 |
| C | 1.780077  | 3.460968  | -0.375757 | C | -6.836792  | 3.534670  | -0.412649 |
| C | 2.499770  | 3.126070  | -1.592472 | C | -6.099461  | 3.131841  | -1.599911 |
| C | 3.932163  | 3.152619  | -1.608548 | C | -4.668102  | 3.116502  | -1.590820 |
| C | 0.348773  | 2.357420  | -2.581857 | C | -8.261409  | 2.378463  | -2.593246 |
| C | 1.785971  | 2.379093  | -2.597036 | C | -6.816313  | 2.360293  | -2.577399 |
| C | 2.511702  | 1.368745  | -3.326775 | C | -6.104065  | 1.357702  | -3.322637 |
| C | 3.943729  | 1.385408  | -3.329418 | C | -4.673569  | 1.353493  | -3.325877 |
| C | 0.363276  | 0.136861  | -3.655123 | C | -8.277258  | 0.163126  | -3.680359 |
| C | 1.797174  | 0.146248  | -3.648287 | C | -6.840328  | 0.152832  | -3.665893 |
| C | 2.524933  | -1.092137 | -3.516331 | C | -6.125438  | -1.091597 | -3.525506 |
| C | 3.965963  | -1.078062 | -3.500535 | C | -4.679441  | -1.101016 | -3.531137 |
| C | 0.369489  | -2.236347 | -2.997134 | C | -8.288189  | -2.211425 | -2.990627 |
| C | 1.805041  | -2.227406 | -2.985852 | C | -6.851315  | -2.215266 | -2.988887 |
| C | 2.529765  | -3.086665 | -2.067748 | C | -6.118072  | -3.063657 | -2.061756 |
| C | -0.357919 | -3.099855 | -2.085379 | C | -9.009366  | -3.118954 | -2.067707 |
| C | -3.959794 | -3.558692 | -0.920689 | C | -11.066048 | -3.871501 | -0.958590 |
| C | -2.517731 | -3.565997 | -0.927676 | C | -10.387398 | -3.962407 | -0.279691 |
| C | -1.793425 | -3.609167 | 0.321396  | C | -8.994601  | -3.702941 | 0.348149  |
| C | -0.361452 | -3.607923 | 0.322587  | C | -8.955480  | -2.507455 | 2.540061  |
| C | -3.949241 | -3.219397 | 1.523873  | C | -10.405486 | -0.171765 | 3.862788  |
| C | -2.513654 | -3.198589 | 1.510393  | C | -9.007522  | -0.248751 | 3.609129  |
| C | -1.797953 | -2.393872 | 2.463114  | C | -11.080285 | 1.061218  | 3.736919  |
| C | -0.359449 | -2.389054 | 2.462579  | C | -10.419255 | 2.193493  | 3.195626  |
| C | -3.948576 | -1.399037 | 3.184444  | C | -9.027479  | 2.148264  | 2.943443  |
| C | -2.519273 | -1.349297 | 3.143418  | C | -8.976550  | 3.440117  | 0.803198  |
| C | -1.816650 | -0.112925 | 3.449747  | C | -10.373390 | 3.428224  | -1.910003 |
| C | -0.353161 | -0.110443 | 3.454769  | C | -8.985361  | 3.232672  | -1.686303 |
| C | -3.976720 | 1.052165  | 3.462935  | C | -11.038966 | 2.695246  | -2.919660 |
| C | -2.541216 | 1.099086  | 3.498919  | C | -10.377453 | 1.647410  | -3.602156 |
| C | -1.892180 | 2.503174  | 3.396429  | C | -8.989098  | 1.434734  | -3.403478 |
| C | -0.285149 | 2.505339  | 3.400479  | C | -8.971537  | -1.062151 | -3.481637 |
| C | -3.968210 | 3.052472  | 2.047150  | C | -10.406422 | -3.370405 | -2.103971 |
| C | -2.543256 | 3.071241  | 2.105219  | H | 10.077958  | -3.400290 | -0.831139 |
| C | -1.814637 | 3.364104  | 0.919947  | H | 10.956320  | -4.197522 | 1.202721  |
| C | -0.355362 | 3.359697  | 0.920763  | H | 12.130203  | -2.927649 | 3.030845  |
| C | -3.948843 | 3.467399  | -0.377924 | H | 10.953131  | -1.034225 | 4.203122  |
| C | -2.518788 | 3.414985  | -0.344070 | H | 10.076408  | 0.959554  | 3.297088  |
| C | -1.799132 | 3.054466  | -1.547251 | H | 10.976380  | 3.123631  | 2.949168  |
| C | -0.369593 | 3.055891  | -1.547386 | H | 12.131619  | 4.080944  | 0.927987  |
| C | -3.953537 | 2.363812  | -2.590718 | H | 10.936422  | 4.158335  | -1.285765 |
| C | -2.515313 | 2.350169  | -2.578944 | H | 10.051883  | 2.399479  | -2.566439 |

|                          |            |           |           |   |           |           |           |
|--------------------------|------------|-----------|-----------|---|-----------|-----------|-----------|
| H                        | 10.955278  | 1.023701  | -4.243689 | C | 6.102474  | 3.537375  | -0.470066 |
| H                        | 12.150614  | -1.180991 | -4.037094 | C | 6.832796  | 3.210091  | -1.684633 |
| H                        | 10.987393  | -3.150988 | -2.988126 | C | 8.269404  | 3.237706  | -1.697887 |
| H                        | -12.150214 | -4.106143 | -1.007936 | C | 4.671226  | 2.435273  | -2.675061 |
| H                        | -10.952252 | -4.209487 | 1.203186  | C | 6.116967  | 2.445846  | -2.675608 |
| H                        | -10.061909 | -2.455449 | 2.480064  | C | 6.843553  | 1.418330  | -3.378062 |
| H                        | -10.969882 | -1.085196 | 4.145481  | C | 8.280446  | 1.431580  | -3.388707 |
| H                        | -12.162856 | 1.121494  | 3.976497  | C | 4.684508  | 0.179467  | -3.665233 |
| H                        | -11.002327 | 3.104364  | 2.944153  | C | 6.116765  | 0.187059  | -3.644205 |
| H                        | -10.080936 | 3.338580  | 0.767209  | C | 6.837002  | -1.039079 | -3.434629 |
| H                        | -10.941750 | 4.143759  | -1.279250 | C | 8.283218  | -1.035852 | -3.427806 |
| H                        | -12.115597 | 2.883129  | -3.114913 | C | 4.685248  | -2.182056 | -2.949172 |
| H                        | -10.950287 | 0.979495  | -4.279415 | C | 6.118170  | -2.175190 | -2.928558 |
| H                        | -10.075594 | -1.025340 | -3.379101 | C | 6.846307  | -3.051942 | -2.024660 |
| H                        | -10.985814 | -3.153484 | -3.025906 | C | 3.956537  | -3.042946 | -2.037236 |
| C                        | -2.422150  | 3.363207  | 4.619689  | C | 0.360642  | -3.512166 | -0.892608 |
| C                        | -1.776018  | 4.723346  | 4.652651  | C | 1.799007  | -3.511438 | -0.888240 |
| C                        | -0.417810  | 4.728851  | 4.651782  | C | 2.517507  | -3.561328 | 0.363846  |
| C                        | 0.239602   | 3.374456  | 4.619420  | C | 3.951047  | -3.570752 | 0.368597  |
| H                        | 0.186268   | 5.660787  | 4.650546  | C | 0.365228  | -3.160814 | 1.547595  |
| H                        | -2.387557  | 5.650461  | 4.652079  | C | 1.794034  | -3.166318 | 1.554673  |
| H                        | -2.179951  | 2.796602  | 5.559047  | C | 2.510880  | -2.402206 | 2.554261  |
| H                        | -3.532615  | 3.428264  | 4.576186  | C | 3.956039  | -2.424805 | 2.560256  |
| H                        | 1.348881   | 3.449673  | 4.572419  | C | 0.357702  | -1.331783 | 3.220016  |
| H                        | 0.006313   | 2.808101  | 5.561283  | C | 1.795741  | -1.372589 | 3.257738  |
|                          |            |           |           | C | 2.533290  | -0.162995 | 3.599432  |
|                          |            |           |           | C | 3.969792  | -0.179958 | 3.579080  |
|                          |            |           |           | C | 0.359885  | 1.170687  | 3.887156  |
| <b>1@ (9,0), site b:</b> |            |           |           | C | 1.833931  | 1.081263  | 3.519348  |
|                          |            |           |           | C | 2.535783  | 2.172866  | 2.933800  |
| 214                      |            |           |           | C | 3.970279  | 2.165988  | 2.893433  |
| -29182.991097            |            |           |           | C | 0.368536  | 2.984068  | 1.984426  |
| C                        | 8.964733   | -3.501594 | -0.854777 | C | 1.785393  | 2.994892  | 1.973350  |
| C                        | 8.994738   | -3.290824 | 1.632566  | C | 2.509928  | 3.417752  | 0.795634  |
| C                        | 10.384951  | -3.480449 | 1.844597  | C | 3.953482  | 3.445970  | 0.788345  |
| C                        | 11.058477  | -2.733058 | 2.839135  | C | 0.361888  | 3.456434  | -0.441211 |
| C                        | 9.009319   | -1.470668 | 3.325180  | C | 1.791568  | 3.479496  | -0.450223 |
| C                        | 10.400533  | -1.678698 | 3.514084  | C | 2.514337  | 3.157921  | -1.666895 |
| C                        | 8.985987   | 1.029555  | 3.374260  | C | 3.946464  | 3.173016  | -1.670660 |
| C                        | 9.009556   | 3.083876  | 1.949307  | C | 0.357325  | 2.414294  | -2.674741 |
| C                        | 10.401179  | 3.358091  | 1.988593  | C | 1.796545  | 2.421380  | -2.678155 |
| C                        | 11.059283  | 3.854769  | 0.838913  | C | 2.521080  | 1.394641  | -3.387953 |
| C                        | 8.992384   | 3.649658  | -0.470648 | C | 3.954719  | 1.401133  | -3.382189 |
| C                        | 10.383972  | 3.921846  | -0.401569 | C | 0.364283  | 0.168666  | -3.690283 |
| C                        | 8.961367   | 2.443898  | -2.656202 | C | 1.799094  | 0.171016  | -3.685466 |
| C                        | 9.007127   | 0.178795  | -3.708515 | C | 2.523408  | -1.068764 | -3.525679 |
| C                        | 10.402415  | 0.090014  | -3.952651 | C | 3.965169  | -1.063610 | -3.511495 |
| C                        | 11.072464  | -1.145905 | -3.796657 | C | 0.365039  | -2.191241 | -2.976354 |
| C                        | 9.008182   | -2.201051 | -2.987162 | C | 1.800472  | -2.189149 | -2.970586 |
| C                        | 10.403860  | -2.260973 | -3.240194 | C | 2.523553  | -3.043754 | -2.046239 |
| C                        | 8.283048   | -3.067212 | -2.026635 | C | -0.361533 | -3.043696 | -2.054033 |
| C                        | 4.674770   | -3.511513 | -0.874713 | C | -3.954427 | -3.502949 | -0.877781 |
| C                        | 6.120663   | -3.518626 | -0.870268 | C | -2.515044 | -3.507651 | -0.887277 |
| C                        | 6.836526   | -3.602907 | 0.377999  | C | -1.791430 | -3.562319 | 0.359606  |
| C                        | 8.273303   | -3.630838 | 0.382197  | C | -0.358650 | -3.558847 | 0.356643  |
| C                        | 4.672230   | -3.194126 | 1.571911  | C | -3.939102 | -3.199725 | 1.573823  |
| C                        | 6.105380   | -3.200876 | 1.569037  | C | -2.510427 | -3.187557 | 1.560988  |
| C                        | 6.829226   | -2.414298 | 2.530445  | C | -1.787837 | -2.403844 | 2.539359  |
| C                        | 8.275619   | -2.428227 | 2.535868  | C | -0.354873 | -2.379318 | 2.524107  |
| C                        | 4.685125   | -1.400506 | 3.266231  | C | -3.942299 | -1.402466 | 3.265388  |
| C                        | 6.118999   | -1.403163 | 3.261687  | C | -2.506149 | -1.376767 | 3.244948  |
| C                        | 6.859604   | -0.192500 | 3.583308  | C | -1.778063 | -0.169101 | 3.599635  |
| C                        | 8.296857   | -0.197387 | 3.590183  | C | -0.368243 | -0.150361 | 3.607499  |
| C                        | 4.698291   | 1.051195  | 3.437776  | C | -3.974609 | 1.056587  | 3.430394  |
| C                        | 6.144352   | 1.047434  | 3.428937  | C | -2.531869 | 1.090115  | 3.469338  |
| C                        | 6.860436   | 2.168177  | 2.877594  | C | -1.837369 | 2.204337  | 2.937401  |
| C                        | 8.297016   | 2.172835  | 2.878086  | C | -0.365931 | 2.458311  | 3.222954  |
| C                        | 4.686438   | 3.004597  | 1.950728  | C | -3.971896 | 3.007301  | 1.946207  |
| C                        | 6.118009   | 2.999988  | 1.940587  | C | -2.536200 | 3.009576  | 1.971496  |
| C                        | 6.827642   | 3.425609  | 0.765334  | C | -1.798385 | 3.439949  | 0.803778  |
| C                        | 8.274281   | 3.439405  | 0.760831  | C | -0.351730 | 3.375832  | 0.812791  |
| C                        | 4.668386   | 3.528215  | -0.461989 | C | -3.952442 | 3.535610  | -0.454917 |



|   |           |           |           |   |           |           |           |
|---|-----------|-----------|-----------|---|-----------|-----------|-----------|
| C | -6.049551 | -3.296226 | -1.929722 | C | -4.440679 | -0.115759 | 3.889962  |
| C | -5.145666 | 2.377469  | -2.897335 | C | -0.655039 | 0.448201  | 4.373409  |
| C | -6.430642 | 2.844004  | -2.435579 | C | -1.962902 | -0.224213 | 3.972824  |
| C | -2.352144 | -2.741381 | -2.669163 | C | 1.853156  | 0.294295  | 3.994960  |
| C | -3.554446 | -3.223451 | -2.040846 | C | 0.577359  | -0.348163 | 3.963663  |
| C | -2.660539 | 2.480804  | -2.811729 | C | 4.343053  | 0.156596  | 3.935625  |
| C | -3.940744 | 2.924407  | -2.321733 | C | 3.055628  | -0.493523 | 3.905247  |
| C | 0.140737  | -2.640643 | -2.751196 | C | 6.830785  | 0.016777  | 3.976716  |
| C | -1.069158 | -3.146051 | -2.144627 | C | 5.550384  | -0.633371 | 3.875836  |
| C | -0.174283 | 2.573901  | -2.712423 | C | 7.987950  | -0.841145 | 3.967892  |
| C | -1.458184 | 2.997159  | -2.206971 | C | -6.994304 | -1.439022 | 3.610937  |
| C | 2.629211  | -2.536118 | -2.816833 | C | -8.227256 | -2.136720 | 3.342467  |
| C | 1.421246  | -3.064794 | -2.235505 | C | -4.501843 | -1.499112 | 3.521599  |
| C | 2.310793  | 2.682980  | -2.613477 | C | -5.782574 | -2.090869 | 3.195853  |
| C | 1.026179  | 3.079867  | -2.092592 | C | -2.013344 | -1.566099 | 3.487197  |
| C | 5.116511  | -2.414981 | -2.864825 | C | -3.285567 | -2.150057 | 3.121775  |
| C | 3.907208  | -2.970177 | -2.307344 | C | 0.489802  | -1.666811 | 3.432570  |
| C | 4.795321  | 2.781036  | -2.505919 | C | -0.795476 | -2.225096 | 3.059899  |
| C | 3.509012  | 3.171001  | -1.981432 | C | 2.975023  | -1.840132 | 3.401058  |
| C | 7.611840  | -2.330629 | -2.943723 | C | 1.693558  | -2.341905 | 2.991491  |
| C | 6.398925  | -2.869866 | -2.383133 | C | 5.470451  | -1.983845 | 3.354597  |
| C | 7.283759  | 2.924289  | -2.438747 | C | 4.179217  | -2.489158 | 2.941919  |
| C | 6.002635  | 3.257546  | -1.872165 | C | 7.909349  | -2.136668 | 3.455004  |
| C | 8.860878  | -2.902981 | -2.476364 | C | 6.671777  | -2.650713 | 2.929115  |
| C | 8.444199  | 3.474868  | -1.777563 | C | -8.283128 | -3.151670 | 2.388138  |
| C | -6.499388 | 3.553647  | -1.182398 | C | -5.841385 | -3.118054 | 2.180100  |
| C | -7.779259 | 3.764418  | -0.547730 | C | -7.112169 | -3.510017 | 1.626870  |
| C | -8.958381 | 3.619527  | -1.381181 | C | -3.345334 | -3.139593 | 2.077897  |
| C | -4.017403 | 3.571098  | -1.039737 | C | -4.620852 | -3.470182 | 1.491633  |
| C | -5.304514 | 3.715197  | -0.399894 | C | -0.862101 | -3.166317 | 1.980586  |
| C | -1.538248 | 3.586672  | -0.897674 | C | -2.138543 | -3.484373 | 1.381599  |
| C | -2.820173 | 3.704652  | -0.255523 | C | 1.622899  | -3.257623 | 1.883560  |
| C | 0.946116  | 3.624633  | -0.763515 | C | 0.346200  | -3.518403 | 1.270208  |
| C | -0.337004 | 3.691905  | -0.100788 | C | 4.108214  | -3.355021 | 1.799767  |
| C | 3.428514  | 3.685013  | -0.638915 | C | 2.830862  | -3.589775 | 1.173502  |
| C | 2.148163  | 3.730415  | 0.020307  | C | 6.609857  | -3.484910 | 1.721661  |
| C | 5.923051  | 3.735163  | -0.508732 | C | 5.324258  | -3.646440 | 1.076233  |
| C | 4.634923  | 3.760878  | 0.147806  | C | 7.776588  | -3.777063 | 0.951092  |
| C | 8.368098  | 3.910678  | -0.457674 | C | -7.175979 | -3.871303 | 0.217971  |
| C | 7.125292  | 3.840033  | 0.274735  | C | -8.416047 | -3.949360 | -0.516207 |
| C | -7.846754 | 3.793010  | 0.871016  | C | -4.687692 | -3.783009 | 0.093894  |
| C | -5.398188 | 3.648264  | 1.033873  | C | -5.973547 | -3.768834 | -0.564832 |
| C | -6.694761 | 3.501848  | 1.660272  | C | -2.204976 | -3.768585 | -0.029105 |
| C | -2.906628 | 3.559839  | 1.174923  | C | -3.480917 | -3.726540 | -0.693048 |
| C | -4.192784 | 3.364706  | 1.783132  | C | 0.279360  | -3.754586 | -0.145513 |
| C | -0.416658 | 3.510537  | 1.319072  | C | -0.997825 | -3.685818 | -0.813596 |
| C | -1.708036 | 3.251471  | 1.927200  | C | 2.762844  | -3.757910 | -0.257119 |
| C | 2.073398  | 3.493429  | 1.439072  | C | 1.489187  | -3.656730 | -0.922791 |
| C | 0.792788  | 3.202555  | 2.053947  | C | 5.251230  | -3.735619 | -0.359579 |
| C | 4.563707  | 3.488052  | 1.553454  | C | 3.972615  | -3.612546 | -1.022398 |
| C | 3.282203  | 3.188981  | 2.150978  | C | 7.728201  | -3.761379 | -0.467238 |
| C | 7.055849  | 3.495718  | 1.686635  | C | 6.455219  | -3.569105 | -1.123639 |
| C | 5.779501  | 3.136155  | 2.248810  | C | 8.918846  | -3.612148 | -1.284916 |
| C | 8.224117  | 3.122429  | 2.446495  | H | 9.697546  | -0.686349 | -3.977717 |
| C | -6.777007 | 2.665944  | 2.869701  | H | 9.552523  | 1.762139  | -3.736986 |
| C | -8.023877 | 2.132516  | 3.352103  | H | -9.484695 | -3.457642 | -2.326078 |
| C | -4.281243 | 2.528907  | 2.946596  | H | -9.592821 | -1.777229 | -3.774835 |
| C | -5.582620 | 2.012408  | 3.325097  | H | -9.825172 | 2.685431  | -3.123319 |
| C | -1.804856 | 2.453776  | 3.103722  | H | -9.727368 | 0.667968  | -4.029445 |
| C | -3.082244 | 1.934430  | 3.476175  | H | 9.802954  | -2.678831 | -3.471437 |
| C | 0.732924  | 2.358841  | 3.202656  | H | 9.438082  | 3.421938  | -2.267736 |
| C | -0.580536 | 2.018970  | 3.898243  | H | 9.303879  | 4.195963  | 0.065919  |
| C | 3.212181  | 2.238649  | 3.228177  | H | -8.852676 | 3.791004  | 1.338445  |
| C | 1.931423  | 1.706954  | 3.623054  | H | -9.941955 | 3.965816  | -0.997986 |
| C | 5.707702  | 2.119495  | 3.278119  | H | 9.219661  | 3.522157  | 2.164656  |
| C | 4.421690  | 1.552521  | 3.611510  | H | -8.967025 | 2.693834  | 3.188875  |
| C | 8.154579  | 2.117649  | 3.410471  | H | 9.097683  | 1.748051  | 3.864335  |
| C | 6.909983  | 1.444142  | 3.688898  | H | -9.102090 | 0.406605  | 4.073463  |
| C | -8.101180 | 0.833548  | 3.857113  | H | 8.986228  | -0.431740 | 4.226060  |
| C | -5.660818 | 0.658542  | 3.831093  | H | -9.174376 | -1.784183 | 3.801251  |
| C | -6.933629 | -0.007926 | 3.898709  | H | 8.847591  | -2.714510 | 3.326181  |
| C | -3.160558 | 0.547896  | 3.949263  | H | -9.271421 | -3.576476 | 2.118569  |



|   |           |           |           |   |           |           |           |
|---|-----------|-----------|-----------|---|-----------|-----------|-----------|
| H | 8.775587  | -3.767680 | 1.434133  | C | 4.794406  | 2.807974  | -2.565038 |
| H | -9.350829 | -4.240439 | 0.006476  | C | 3.505586  | 3.202176  | -2.055423 |
| H | 9.899192  | -3.946117 | -0.883309 | C | 7.615991  | -2.319669 | -2.969989 |
| C | -0.591801 | 2.964475  | 5.192982  | C | 6.398715  | -2.852389 | -2.411519 |
| C | 0.425458  | 2.542451  | 6.215198  | C | 7.286140  | 2.949581  | -2.476396 |
| C | 0.397610  | 1.238244  | 6.602501  | C | 5.999302  | 3.281846  | -1.920730 |
| C | -0.657950 | 0.371071  | 5.975397  | C | 8.860047  | -2.895999 | -2.502680 |
| H | 1.143227  | 0.812118  | 7.306751  | C | 8.440953  | 3.503579  | -1.810900 |
| H | 1.196736  | 3.252883  | 6.580383  | C | -6.512299 | 3.551843  | -1.227835 |
| H | -1.628928 | 2.914624  | 5.618790  | C | -7.788598 | 3.764692  | -0.586526 |
| H | -0.440647 | 4.014170  | 4.847513  | C | -8.973030 | 3.607896  | -1.406431 |
| H | -0.553862 | -0.702077 | 6.261196  | C | -4.029511 | 3.587589  | -1.105904 |
| H | -1.679189 | 0.692800  | 6.311365  | C | -5.310917 | 3.715450  | -0.454389 |

1@(6,5), site b:

|               |           |           |           |   |           |           |           |
|---------------|-----------|-----------|-----------|---|-----------|-----------|-----------|
| 192           |           |           |           |   |           |           |           |
| -26032.867639 |           |           |           |   |           |           |           |
| C             | 8.709226  | -0.205091 | -3.853315 | C | 4.617202  | 3.770759  | 0.088530  |
| C             | 8.628140  | 1.178969  | -3.719778 | C | 8.354996  | 3.943876  | -0.491020 |
| C             | 7.376007  | 1.814442  | -3.382466 | C | 7.109306  | 3.866813  | 0.231600  |
| C             | 6.178620  | 1.056028  | -3.639995 | C | -7.847015 | 3.799067  | 0.834828  |
| C             | 6.262258  | -0.382054 | -3.753773 | C | -5.395347 | 3.635228  | 0.981251  |
| C             | 7.544654  | -1.033244 | -3.640777 | C | -6.694219 | 3.495865  | 1.614469  |
| C             | 4.882812  | 1.662063  | -3.424955 | C | -2.906388 | 3.555371  | 1.096803  |
| C             | 3.680329  | 0.921544  | -3.720788 | C | -4.188155 | 3.346420  | 1.716556  |
| C             | 3.762496  | -0.515812 | -3.787961 | C | -0.426120 | 3.488246  | 1.215153  |
| C             | 5.046055  | -1.149019 | -3.604092 | C | -1.701839 | 3.216047  | 1.815143  |
| C             | 2.393190  | 1.541436  | -3.524817 | C | 2.051218  | 3.461749  | 1.350465  |
| C             | 1.187600  | 0.785530  | -3.781950 | C | 0.768652  | 3.143703  | 1.930802  |
| C             | 1.269274  | -0.654335 | -3.800621 | C | 4.537425  | 3.470376  | 1.490441  |
| C             | 2.555959  | -1.285240 | -3.608637 | C | 3.258793  | 3.141876  | 2.068534  |
| C             | -0.099790 | 1.410915  | -3.597844 | C | 7.034415  | 3.515984  | 1.643902  |
| C             | -1.304224 | 0.646465  | -3.816273 | C | 5.758935  | 3.128966  | 2.189465  |
| C             | -1.222091 | -0.793247 | -3.787173 | C | 8.202717  | 3.159441  | 2.411170  |
| C             | 0.063318  | -1.417347 | -3.587885 | C | -6.775346 | 2.657456  | 2.821832  |
| C             | -2.593208 | 1.277051  | -3.639113 | C | -8.023384 | 2.132094  | 3.310140  |
| C             | -3.797451 | 0.505240  | -3.824568 | C | -4.270577 | 2.499962  | 2.882958  |
| C             | -3.715079 | -0.931300 | -3.748294 | C | -5.580482 | 1.993890  | 3.264992  |
| C             | -2.429435 | -1.548281 | -3.536850 | C | -1.774203 | 2.332117  | 2.953383  |
| C             | -5.083541 | 1.137054  | -3.654685 | C | -3.085486 | 1.871881  | 3.382924  |
| C             | -6.297890 | 0.367365  | -3.810090 | C | 0.680133  | 2.215674  | 3.036347  |
| C             | -6.213574 | -1.070165 | -3.690434 | C | -0.578835 | 1.708401  | 3.440765  |
| C             | -4.918885 | -1.672874 | -3.461133 | C | 3.191636  | 2.173678  | 3.132546  |
| C             | -7.582365 | 1.016801  | -3.710328 | C | 1.919724  | 1.585331  | 3.498783  |
| C             | -8.744180 | 0.185918  | -3.927456 | C | 5.696455  | 2.110598  | 3.210183  |
| C             | -8.662037 | -1.197852 | -3.790495 | C | 4.411989  | 1.529158  | 3.536753  |
| C             | -7.411771 | -1.831155 | -3.443452 | C | 8.142040  | 2.144476  | 3.366069  |
| C             | -7.327938 | -2.967368 | -2.537904 | C | 6.905658  | 1.451796  | 3.628548  |
| C             | -8.486983 | -3.530836 | -1.887450 | C | -8.109760 | 0.830758  | 3.810275  |
| C             | -7.660223 | 2.306545  | -3.046512 | C | -5.671706 | 0.643093  | 3.768286  |
| C             | -8.908970 | 2.883039  | -2.591909 | C | -6.948619 | -0.017381 | 3.843898  |
| C             | -4.836395 | -2.815966 | -2.597142 | C | -3.181558 | 0.519439  | 3.895987  |
| C             | -6.046609 | -3.294124 | -1.966873 | C | -4.458996 | -0.139145 | 3.847949  |
| C             | -5.161224 | 2.385602  | -2.951987 | C | -0.695284 | 0.488671  | 4.379772  |
| C             | -6.448266 | 2.843435  | -2.480623 | C | -1.980089 | -0.256860 | 3.992095  |
| C             | -2.350735 | -2.718162 | -2.699439 | C | 1.872887  | 0.262593  | 3.997408  |
| C             | -3.552955 | -3.206128 | -2.072211 | C | 0.583615  | -0.473588 | 4.383486  |
| C             | -2.673922 | 2.504200  | -2.887921 | C | 4.351864  | 0.143140  | 3.887444  |
| C             | -3.955415 | 2.942549  | -2.392526 | C | 3.073920  | -0.514631 | 3.924400  |
| C             | 0.139631  | -2.617376 | -2.786870 | C | 6.841407  | 0.021063  | 3.913201  |
| C             | -1.066503 | -3.120848 | -2.180265 | C | 5.565512  | -0.639314 | 3.826236  |
| C             | -0.183118 | 2.615579  | -2.804215 | C | 8.003417  | -0.827874 | 3.893648  |
| C             | -1.467407 | 3.035224  | -2.300602 | C | -7.011456 | -1.449209 | 3.562521  |
| C             | 2.629415  | -2.508630 | -2.850155 | C | -8.245491 | -2.140603 | 3.286530  |
| C             | 1.418434  | -3.036418 | -2.270672 | C | -4.516474 | -1.527414 | 3.504024  |
| C             | 2.307372  | 2.715560  | -2.693718 | C | -5.797643 | -2.109801 | 3.162132  |
| C             | 1.017702  | 3.121247  | -2.188651 | C | -2.021935 | -1.585145 | 3.500739  |
| C             | 5.116285  | -2.394400 | -2.894787 | C | -3.291438 | -2.174526 | 3.119348  |
| C             | 3.905679  | -2.947367 | -2.342498 | C | 0.477171  | -1.709632 | 3.466264  |

|   |           |           |           |               |           |           |           |
|---|-----------|-----------|-----------|---------------|-----------|-----------|-----------|
| C | -0.778713 | -2.219431 | 3.052102  |               |           |           |           |
| C | 2.984298  | -1.872388 | 3.424920  |               |           |           |           |
| C | 1.676644  | -2.336418 | 2.990149  |               |           |           |           |
|   |           |           |           | 192           |           |           |           |
|   |           |           |           | -26032.689530 |           |           |           |
| C | 5.480114  | -1.992534 | 3.327115  | C             | 8.716366  | -0.214578 | -3.841226 |
| C | 4.174126  | -2.501166 | 2.936553  | C             | 8.635112  | 1.168143  | -3.702352 |
| C | 7.922236  | -2.130222 | 3.395815  | C             | 7.383203  | 1.799851  | -3.352615 |
| C | 6.678687  | -2.656895 | 2.896566  | C             | 6.186088  | 1.043150  | -3.609743 |
| C | -8.296557 | -3.158435 | 2.333892  | C             | 6.268268  | -0.394184 | -3.734405 |
| C | -5.850154 | -3.131530 | 2.144076  | C             | 7.551226  | -1.044090 | -3.623797 |
| C | -7.119514 | -3.520399 | 1.583678  | C             | 4.892083  | 1.647178  | -3.383132 |
| C | -3.347976 | -3.144249 | 2.055014  | C             | 3.689279  | 0.908345  | -3.681972 |
| C | -4.620186 | -3.474021 | 1.461687  | C             | 3.769591  | -0.527175 | -3.762529 |
| C | -0.857133 | -3.147423 | 1.945118  | C             | 5.054315  | -1.163028 | -3.586069 |
| C | -2.133212 | -3.463962 | 1.350164  | C             | 2.404292  | 1.528710  | -3.482065 |
| C | 1.614883  | -3.220690 | 1.851001  | C             | 1.199803  | 0.776866  | -3.745147 |
| C | 0.344591  | -3.489965 | 1.238778  | C             | 1.278716  | -0.660915 | -3.776856 |
| C | 4.102442  | -3.349757 | 1.770914  | C             | 2.563647  | -1.296448 | -3.591386 |
| C | 2.825927  | -3.558078 | 1.140983  | C             | -0.087771 | 1.405151  | -3.560688 |
| C | 6.609184  | -3.496680 | 1.689308  | C             | -1.292997 | 0.646740  | -3.792434 |
| C | 5.315507  | -3.637588 | 1.044607  | C             | -1.214888 | -0.793859 | -3.775757 |
| C | 7.768432  | -3.798746 | 0.919308  | C             | 0.069847  | -1.423330 | -3.574225 |
| C | -7.178617 | -3.880431 | 0.172657  | C             | -2.580412 | 1.279592  | -3.616231 |
| C | -8.414772 | -3.969424 | -0.566205 | C             | -3.786640 | 0.512976  | -3.810647 |
| C | -4.685682 | -3.775884 | 0.059410  | C             | -3.708029 | -0.922836 | -3.747200 |
| C | -5.971468 | -3.766407 | -0.602890 | C             | -2.423329 | -1.546887 | -3.538901 |
| C | -2.201535 | -3.742095 | -0.060037 | C             | -5.073182 | 1.147451  | -3.640016 |
| C | -3.478516 | -3.709290 | -0.723517 | C             | -6.288651 | 0.382784  | -3.804207 |
| C | 0.278132  | -3.735050 | -0.185028 | C             | -6.208410 | -1.055813 | -3.697535 |
| C | -0.994125 | -3.662277 | -0.846560 | C             | -4.915362 | -1.664450 | -3.469996 |
| C | 2.759471  | -3.726628 | -0.289703 | C             | -7.573264 | 1.034068  | -3.693968 |
| C | 1.485400  | -3.628298 | -0.957817 | C             | -8.738901 | 0.208374  | -3.920019 |
| C | 5.244424  | -3.718237 | -0.391734 | C             | -8.659598 | -1.175199 | -3.795759 |
| C | 3.968566  | -3.589999 | -1.054080 | C             | -7.408993 | -1.812896 | -3.451827 |
| C | 7.722327  | -3.768007 | -0.502951 | C             | -7.331227 | -2.949210 | -2.549346 |
| C | 6.452049  | -3.556939 | -1.156122 | C             | -8.492875 | -3.507703 | -1.897120 |
| C | 8.913367  | -3.615403 | -1.313210 | C             | -7.647559 | -2.316066 | -3.022957 |
| H | 9.707184  | -0.672935 | -3.982766 | C             | -8.897677 | 2.898955  | -2.570829 |
| H | 9.564170  | 1.774723  | -3.744976 | C             | -4.838314 | -2.811010 | -2.612025 |
| H | -9.479312 | -3.486919 | -2.382528 | C             | -6.050638 | -3.285220 | -1.982640 |
| H | -9.597261 | -1.794363 | -3.819910 | C             | -5.148956 | 2.389982  | -2.927195 |
| H | -9.852034 | 2.650784  | -3.129418 | C             | -6.434733 | 2.848752  | -2.454591 |
| H | -9.742481 | 0.651703  | -4.063149 | C             | -2.349433 | -2.726208 | -2.711696 |
| H | 9.807448  | -2.668893 | -3.034580 | C             | -3.554874 | -3.209449 | -2.088810 |
| H | 9.440497  | 3.449098  | -2.290402 | C             | -2.658128 | 2.501387  | -2.856032 |
| H | 9.286877  | 4.230918  | 0.039002  | C             | -3.942099 | 2.938556  | -2.359258 |
| H | -8.851727 | 3.808125  | 1.307050  | C             | 0.141867  | -2.627127 | -2.784825 |
| H | -9.957437 | 3.941366  | -1.013187 | C             | -1.068175 | -3.135105 | -2.189454 |
| H | 9.194329  | 3.580608  | 2.145710  | C             | -0.169281 | 2.604616  | -2.763134 |
| H | -8.964024 | 2.701539  | 3.157719  | C             | -1.454129 | 3.026979  | -2.264897 |
| H | 9.087092  | 1.790342  | 3.828395  | C             | 2.633795  | -2.526976 | -2.842975 |
| H | -9.112821 | 0.411377  | 4.031669  | C             | 1.422271  | -3.053510 | -2.267242 |
| H | 9.004475  | -0.408792 | 4.124613  | C             | 2.320331  | 2.700954  | -2.646390 |
| H | -9.195800 | -1.783312 | 3.735028  | C             | 1.031272  | 3.106404  | -2.140739 |
| H | 8.863935  | -2.700963 | 3.255481  | C             | 5.124191  | -2.411701 | -2.884416 |
| H | -9.286110 | -3.575935 | 2.053712  | C             | 3.910769  | -2.966260 | -2.333513 |
| H | 8.768566  | -3.806000 | 1.400287  | C             | 4.805292  | 2.787937  | -2.518120 |
| H | -9.351267 | -4.267694 | -0.050672 | C             | 3.516733  | 3.185394  | -2.007450 |
| H | 9.894374  | -3.948169 | -0.910198 | C             | 7.622868  | -2.330089 | -2.958609 |
| C | -0.967016 | 1.065388  | 5.851877  | C             | 6.407338  | -2.871892 | -2.405364 |
| C | 0.268649  | 1.244083  | 6.698096  | C             | 7.296308  | 2.928387  | -2.438858 |
| C | 1.127972  | 0.193188  | 6.760627  | C             | 6.011601  | 3.261355  | -1.878043 |
| C | 0.817576  | -0.986373 | 5.869869  | C             | 8.872468  | -2.903304 | -2.492984 |
| H | 2.063939  | 0.223822  | 7.357215  | C             | 8.453676  | 3.477158  | -1.772749 |
| H | 0.437741  | 2.189757  | 7.256100  | C             | -6.498172 | 3.554786  | -1.200524 |
| H | -1.642840 | 0.336451  | 6.370435  | C             | -7.778037 | 3.770033  | -0.561620 |
| H | -1.553496 | 2.010241  | 5.751603  | C             | -8.962489 | 3.625908  | -1.389383 |
| H | 1.640943  | -1.739242 | 5.866244  | C             | -4.017016 | 3.576695  | -1.073746 |
| H | -0.114112 | -1.517651 | 6.201194  | C             | -5.299996 | 3.713039  | -0.424836 |
|   |           |           |           | C             | -1.533082 | 3.614792  | -0.949970 |
|   |           |           |           | C             | -2.814420 | 3.706070  | -0.295013 |
|   |           |           |           | C             | 0.948130  | 3.651515  | -0.810463 |
|   |           |           |           | C             | -0.335667 | 3.722063  | -0.164264 |

1@(6,5), site c:



|   |           |           |           |   |           |            |           |
|---|-----------|-----------|-----------|---|-----------|------------|-----------|
| C | 7.487290  | 3.520758  | -0.304681 | C | -2.511253 | 1.296699   | 3.063372  |
| C | 7.488844  | 3.324191  | 1.134121  | C | -1.271009 | 1.961337   | 2.707307  |
| C | 6.244034  | 2.981836  | 1.771092  | C | -1.291251 | 3.041172   | 1.781491  |
| C | 6.237522  | 1.954026  | 2.797198  | C | -2.538148 | 3.364400   | 1.155516  |
| C | 7.476209  | 1.324116  | 3.166599  | C | -2.537269 | 3.553358   | -0.300388 |
| C | 8.692781  | 2.055189  | 2.867074  | C | -1.291790 | 3.394610   | -0.987307 |
| C | 8.700004  | 3.028069  | 1.874713  | C | -1.270730 | 2.608086   | -2.170596 |
| C | 4.981064  | 1.308197  | 3.101254  | C | -2.510398 | 2.070197   | -2.695942 |
| C | 4.979625  | -0.105106 | 3.335219  | C | -2.501774 | 0.774748   | -3.330347 |
| C | 6.233367  | -0.822378 | 3.261354  | C | -1.256297 | 0.061170   | -3.422252 |
| C | 7.474550  | -0.109798 | 3.408049  | C | -1.253613 | -1.361740  | -3.218569 |
| C | 6.238106  | -2.137313 | 2.651931  | C | -2.499318 | -2.017689  | -2.905541 |
| C | 7.483549  | -2.697068 | 2.193597  | C | -2.498981 | -3.041915  | -1.885405 |
| C | 8.691142  | -2.161534 | 2.785605  | C | -1.253565 | -3.363426  | -1.232986 |
| C | 8.686122  | -0.902610 | 3.378010  | C | -1.253312 | -3.555692  | 0.094279  |
| C | 6.233855  | 2.641454  | -2.270019 | C | -2.498131 | -3.419303  | 0.909571  |
| C | 7.472481  | 2.136449  | -2.797585 | C | -2.497910 | -2.701344  | 2.164578  |
| C | 8.688093  | 2.766250  | -2.317654 | C | -3.742222 | -2.161845  | 2.651699  |
| C | 8.696392  | 3.438378  | -1.101286 | C | -3.744726 | -0.852964  | 3.246635  |
| C | 4.978402  | 2.097131  | -2.733555 | C | -4.999091 | -0.139807  | 3.345722  |
| C | 4.978119  | 0.798932  | -3.339500 | C | -5.009090 | 1.272886   | 3.106696  |
| C | 6.232405  | 0.090126  | -3.460294 | C | -3.763329 | 1.933676   | 2.770131  |
| C | 7.472214  | 0.818604  | -3.412425 | C | -3.775384 | 2.970462   | 1.773580  |
| C | 6.238458  | -1.339498 | -3.222033 | C | -5.036378 | 3.264123   | 1.119176  |
| C | 7.484850  | -1.998472 | -2.928356 | C | -5.035029 | 3.455237   | -0.298733 |
| C | 8.691484  | -1.322587 | -3.357781 | C | -3.772831 | 3.340698   | -1.003795 |
| C | 8.684705  | 0.048456  | -3.594938 | C | -3.760327 | 2.608358   | -2.241350 |
| C | 4.989816  | -1.984445 | -2.886450 | C | -5.005888 | 2.067769   | -2.746808 |
| C | 4.993757  | -2.998491 | -1.873756 | C | -4.997386 | 0.771799   | -3.357251 |
| C | 6.247647  | -3.318437 | -1.230895 | C | -3.744971 | 0.054542   | -3.454190 |
| C | 7.489122  | -3.022539 | -1.896951 | C | -3.743187 | -1.3265390 | -3.229705 |
| C | 6.247211  | -3.514836 | 0.205733  | C | -4.995726 | -2.008847  | -2.894560 |
| C | 7.488355  | -3.409484 | 0.926706  | C | -4.996371 | -3.017480  | -1.876397 |
| C | 8.700545  | -3.623187 | 0.161260  | C | -3.745602 | -3.353134  | -1.229532 |
| C | 8.700704  | -3.433593 | -1.216617 | C | -3.744970 | -3.546780  | 0.195504  |
| C | 4.993108  | -3.376679 | 0.910925  | C | -4.995385 | -3.398060  | 0.909538  |
| C | 4.988954  | -2.668038 | 2.156578  | C | -4.994343 | -2.697375  | 2.159720  |
| C | 3.734215  | -2.137273 | 2.647028  | C | -6.246126 | -2.177690  | 2.658831  |
| C | 3.729782  | -0.826492 | 3.237579  | C | -6.248603 | -0.864864  | 3.273300  |
| C | 2.483032  | -0.104589 | 3.313714  | C | -7.494104 | -0.159639  | 3.419012  |
| C | 2.483195  | 1.316399  | 3.059937  | C | -7.504369 | 1.273035   | 3.170080  |
| C | 3.731236  | 1.962485  | 2.767570  | C | -6.269362 | 1.908931   | 2.798339  |
| C | 3.728540  | 2.633283  | -2.232915 | C | -6.282012 | 2.929055   | 1.765447  |
| C | 2.482377  | 2.086610  | -2.688769 | C | -7.527813 | 3.261921   | 1.176388  |
| C | 2.482443  | 0.788924  | -3.320063 | C | -7.526282 | 3.460113   | -0.312089 |
| C | 3.729639  | 0.075085  | -3.440373 | C | -6.279128 | 3.308196   | -1.014194 |
| C | 3.734648  | -1.345434 | -3.220596 | C | -6.265310 | 2.601811   | -2.282520 |
| C | 2.493083  | -2.005603 | -2.901377 | C | -7.500278 | 2.092834   | -2.814664 |
| C | 2.496111  | -3.032773 | -1.884376 | C | -7.491751 | 0.777950   | -3.435440 |
| C | 3.743584  | -3.340934 | -1.228233 | C | -6.247808 | 0.056480   | -3.480687 |
| C | 3.743277  | -3.533770 | 0.196844  | C | -6.246551 | -1.372291  | -3.235904 |
| C | 2.495881  | -3.409232 | 0.910631  | C | -7.489958 | -2.035708  | -2.939791 |
| C | 2.492532  | -2.687036 | 2.162906  | C | -7.491395 | -3.051536  | -1.900534 |
| C | 1.244982  | -2.141597 | 2.637264  | C | -6.249240 | -3.340040  | -1.232865 |
| C | 1.241840  | -0.823873 | 3.212489  | C | -6.248592 | -3.537939  | 0.203287  |
| C | -0.009092 | -0.093836 | 3.279372  | C | -7.490620 | -3.441897  | 0.924247  |
| C | -0.012749 | 1.311791  | 3.033036  | C | -7.488858 | -2.740851  | 2.197258  |
| C | 1.239057  | 1.973355  | 2.705462  | C | -8.698966 | -2.216729  | 2.794092  |
| C | 1.238639  | 2.617875  | -2.166966 | C | -8.701065 | -0.959852  | 3.390332  |
| C | -0.012995 | 2.071449  | -2.661202 | C | -8.737910 | 2.960783   | 1.866630  |
| C | -0.009402 | 0.788610  | -3.284477 | C | -8.725620 | 1.993025   | 2.863888  |
| C | 1.241733  | 0.068125  | -3.418039 | C | -8.720402 | 2.709727   | -2.330640 |
| C | 1.245126  | -1.355081 | -3.215732 | C | -8.734340 | 3.373275   | -1.109585 |
| C | -0.003018 | -2.011689 | -2.888052 | C | -8.698887 | -1.369881  | -3.775540 |
| C | -0.001337 | -3.031633 | -1.882397 | C | -8.699227 | -0.000063  | -3.620767 |
| C | 1.251627  | -3.359732 | -1.232380 | C | -8.702126 | -3.653557  | 0.157861  |
| C | 1.251628  | -3.551654 | 0.194791  | C | -8.702516 | -3.462212  | -1.219672 |
| C | -0.001211 | -3.406847 | 0.908136  | H | 9.650096  | -0.457786  | 3.701547  |
| C | -0.002638 | -2.687791 | 2.147014  | H | 9.655375  | 1.747660   | 3.326557  |
| C | -1.252769 | -2.149518 | 2.638662  | H | 9.667306  | 3.474801   | 1.563038  |
| C | -1.255749 | -0.832542 | 3.215390  | H | 9.663369  | 3.791413   | -0.685260 |
| C | -2.502422 | -0.123102 | 3.320556  | H | 9.649469  | 2.598685   | -2.846851 |

|   |           |           |           |   |           |           |           |
|---|-----------|-----------|-----------|---|-----------|-----------|-----------|
| H | 9.647342  | 0.565630  | -3.789412 | C | -0.355784 | -3.045560 | 5.648036  |
| H | 9.659616  | -1.865247 | -3.367900 | C | -1.703497 | -2.895157 | 5.169425  |
| H | 9.665478  | -3.461975 | -1.764772 | C | -2.263240 | -3.928406 | 4.368111  |
| H | 9.665501  | -3.798244 | 0.681468  | C | -1.431821 | -4.932536 | 3.792728  |
| H | 9.658182  | -2.688921 | 2.648901  | C | 0.023712  | -0.628599 | 5.417301  |
| H | -9.667407 | -0.522127 | 3.716856  | C | -1.326076 | -0.469347 | 4.924590  |
| H | -9.686796 | 1.681457  | 3.323750  | C | -2.285939 | -1.533463 | 5.081819  |
| H | -9.708392 | 3.398750  | 1.551696  | C | -1.677987 | 0.685727  | 4.137477  |
| H | -9.704538 | 3.714251  | -0.691525 | C | -3.053969 | 0.946111  | 3.903649  |
| H | -9.680494 | 2.537399  | -2.860753 | C | -4.032973 | 0.017774  | 4.327078  |
| H | -9.664407 | 0.509541  | -3.822877 | C | -3.653360 | -1.247693 | 4.833301  |
| H | -9.663680 | -1.918656 | -3.389541 | C | 1.039252  | 0.318111  | 5.049908  |
| H | -9.668024 | -3.488445 | -1.766790 | C | 0.785120  | 1.114439  | 3.859434  |
| H | -9.667689 | -3.827223 | 0.677418  | C | -0.557628 | 1.296903  | 3.382218  |
| H | -9.663137 | -2.749100 | 2.656057  | C | 0.680803  | -5.462509 | 1.999018  |
| H | -1.060619 | 5.878515  | -0.434560 | C | -0.675398 | -5.506716 | 1.515905  |
| H | 0.063786  | 5.594050  | -1.804034 | C | -1.774734 | -5.447802 | 2.446374  |
| H | 0.066163  | 5.010922  | 3.101259  | C | -0.928372 | -5.270494 | 0.116436  |
| H | -1.079056 | 5.588249  | 1.846747  | C | -2.256893 | -5.403571 | -0.361404 |
| C | 1.995952  | 7.075925  | -0.563998 | C | -3.316443 | -5.644271 | 0.546160  |
| C | 2.921349  | 7.783019  | 0.236181  | C | -3.094941 | -5.580623 | 1.940803  |
| C | 2.879393  | 7.661153  | 1.644740  | C | 1.788189  | -5.468017 | 1.095039  |
| C | 1.928009  | 6.812445  | 2.255733  | C | 1.519784  | -4.735979 | -0.129563 |
| C | 0.989620  | 6.114059  | 1.461054  | C | 0.171234  | -4.596953 | -0.616116 |
| H | 2.031881  | 7.160392  | -1.671743 | C | 3.131597  | -5.613044 | 1.573449  |
| H | 3.682303  | 8.436082  | -0.242944 | C | 3.371126  | -5.969041 | 2.952326  |
| H | 3.602014  | 8.223150  | 2.272312  | C | 2.539931  | -3.815451 | -0.562863 |
| H | 1.906622  | 6.701260  | 3.361940  | C | 3.897285  | -3.970681 | -0.096314 |
|   |           |           |           | C | 4.226692  | -5.009044 | 0.838624  |
|   |           |           |           | C | 2.105211  | -2.552354 | -1.110423 |
|   |           |           |           | C | 0.761350  | -2.396615 | -1.580406 |
|   |           |           |           | C | -0.142182 | -3.495212 | -1.455617 |
|   |           |           |           | C | 2.885325  | -1.387833 | -0.705456 |
|   |           |           |           | C | 4.234147  | -1.538818 | -0.258893 |
|   |           |           |           | C | 4.833560  | -2.865712 | -0.198272 |
|   |           |           |           | C | 6.176836  | -3.023079 | 0.230627  |
|   |           |           |           | C | 2.135975  | -0.216481 | -0.343992 |
|   |           |           |           | C | 0.781493  | -0.049152 | -0.822779 |
|   |           |           |           | C | 0.196760  | -1.029948 | -1.702579 |
|   |           |           |           | C | -0.043970 | 1.012088  | -0.305036 |
|   |           |           |           | C | -1.254420 | 1.315516  | -0.981880 |
|   |           |           |           | C | -1.689559 | 0.502186  | -2.053509 |
|   |           |           |           | C | -1.020757 | -0.707501 | -2.355919 |
|   |           |           |           | C | 2.631872  | 0.613422  | 0.719228  |
|   |           |           |           | C | 1.636165  | 1.271222  | 1.550418  |
|   |           |           |           | C | 0.295763  | 1.461862  | 1.066098  |
|   |           |           |           | C | 3.974863  | 0.443385  | 1.190199  |
|   |           |           |           | C | 4.843173  | -0.522828 | 0.562134  |
|   |           |           |           | C | 6.194883  | -0.701728 | 1.042288  |
|   |           |           |           | C | 6.962893  | -1.859888 | 0.654461  |
|   |           |           |           | C | 1.902105  | 1.301259  | 2.966657  |
|   |           |           |           | C | 3.252710  | 1.122783  | 3.451510  |
|   |           |           |           | C | 4.332004  | 0.900949  | 2.520505  |
|   |           |           |           | C | 5.669358  | 0.714880  | 3.002150  |
|   |           |           |           | C | 6.662509  | 0.066176  | 2.163030  |
|   |           |           |           | C | -0.758072 | 1.617009  | 2.009448  |
|   |           |           |           | C | 2.373733  | 0.164190  | 5.547915  |
|   |           |           |           | C | 3.481494  | 0.767887  | 4.831850  |
|   |           |           |           | C | 4.818796  | 0.599787  | 5.317153  |
|   |           |           |           | C | 5.933696  | 0.768187  | 4.417565  |
|   |           |           |           | C | 2.687134  | -0.916275 | 6.453218  |
|   |           |           |           | C | 4.030623  | -1.070642 | 6.953322  |
|   |           |           |           | C | 5.062692  | -0.153792 | 6.534143  |
|   |           |           |           | C | 8.760492  | -6.505009 | 4.880403  |
|   |           |           |           | C | 9.019287  | -6.531978 | 6.294816  |
|   |           |           |           | C | 9.873250  | -6.277725 | 3.995676  |
|   |           |           |           | C | 8.313783  | -2.035195 | 1.081144  |
|   |           |           |           | C | 7.993029  | -0.146446 | 2.648114  |
|   |           |           |           | C | 8.866766  | -1.104159 | 2.003271  |
|   |           |           |           | C | 10.235018 | -1.255310 | 2.489458  |
|   |           |           |           | C | 11.043874 | -2.342858 | 2.059837  |
|   |           |           |           | C | 7.276849  | 0.589021  | 4.899538  |

2@(9,0), site a:

|               |           |           |           |   |           |           |           |
|---------------|-----------|-----------|-----------|---|-----------|-----------|-----------|
| 220           |           |           |           |   |           |           |           |
| -29839.808528 |           |           |           |   |           |           |           |
| C             | 9.000574  | -3.496561 | -0.877528 | C | 6.176836  | -3.023079 | 0.198272  |
| C             | 8.995675  | -3.380802 | 0.704195  | C | 2.135975  | -0.216481 | -0.343992 |
| C             | 10.496646 | -3.558440 | 1.264832  | C | 0.781493  | -0.049152 | -0.822779 |
| C             | 11.479610 | -3.833168 | 0.062680  | C | 0.196760  | -1.029948 | -1.702579 |
| C             | 11.353895 | -2.764902 | -0.987411 | C | -0.043970 | 1.012088  | -0.305036 |
| C             | 7.980047  | -4.417337 | 1.255505  | C | -1.254420 | 1.315516  | -0.981880 |
| C             | 8.274378  | -5.339269 | 2.287961  | C | -1.689559 | 0.502186  | -2.053509 |
| C             | 9.641301  | -5.499433 | 2.788702  | C | -1.020757 | -0.707501 | -2.355919 |
| C             | 10.694379 | -4.719797 | 2.266824  | C | 2.631872  | 0.613422  | 0.719228  |
| C             | 7.182771  | -5.952079 | 3.026571  | C | 1.636165  | 1.271222  | 1.550418  |
| C             | 5.837923  | -5.857702 | 2.543769  | C | 0.295763  | 1.461862  | 1.066098  |
| C             | 5.578944  | -5.139738 | 1.321771  | C | 3.974863  | 0.443385  | 1.190199  |
| C             | 6.619054  | -4.277845 | 0.817793  | C | 4.843173  | -0.522828 | 0.562134  |
| C             | 4.721723  | -6.101906 | 3.435302  | C | 6.194883  | -0.701728 | 1.042288  |
| C             | 4.983574  | -6.073019 | 4.849725  | C | 6.962893  | -1.859888 | 0.654461  |
| C             | 6.330695  | -6.209775 | 5.329559  | C | 1.902105  | 1.301259  | 2.966657  |
| C             | 7.415315  | -6.340122 | 4.395731  | C | 3.252710  | 1.122783  | 3.451510  |
| C             | 3.967047  | -5.501904 | 5.711261  | C | 4.332004  | 0.900949  | 2.520505  |
| C             | 4.429026  | -4.705051 | 6.825184  | C | 5.669358  | 0.714880  | 3.002150  |
| C             | 5.776890  | -4.857453 | 7.313234  | C | 6.662509  | 0.066176  | 2.163030  |
| C             | 6.667768  | -5.800398 | 6.679097  | C | -0.758072 | 1.617009  | 2.009448  |
| C             | 3.686153  | -3.505178 | 7.122542  | C | 2.373733  | 0.164190  | 5.547915  |
| C             | 4.459196  | -2.336854 | 7.502960  | C | 3.481494  | 0.767887  | 4.831850  |
| C             | 5.799744  | -2.490492 | 7.994188  | C | 4.818796  | 0.599787  | 5.317153  |
| C             | 6.385863  | -3.814146 | 8.104154  | C | 5.933696  | 0.768187  | 4.417565  |
| C             | 8.008331  | -5.956154 | 7.159356  | C | 2.687134  | -0.916275 | 6.453218  |
| C             | 8.477076  | -5.165101 | 8.273450  | C | 4.030623  | -1.070642 | 6.953322  |
| C             | 7.732745  | -3.968038 | 8.583876  | C | 5.062692  | -0.153792 | 6.534143  |
| C             | 2.345581  | -3.352812 | 6.629334  | C | 8.760492  | -6.505009 | 4.880403  |
| C             | 1.737757  | -4.398038 | 5.844088  | C | 9.019287  | -6.531978 | 6.294816  |
| C             | 2.625429  | -5.356546 | 5.228431  | C | 9.873250  | -6.277725 | 3.995676  |
| C             | 2.285968  | -5.798713 | 3.889524  | C | 8.313783  | -2.035195 | 1.081144  |
| C             | 0.942591  | -5.647563 | 3.410560  | C | 7.993029  | -0.146446 | 2.648114  |
| C             | -0.082294 | -5.067412 | 4.265638  | C | 8.866766  | -1.104159 | 2.003271  |
| C             | 0.386038  | -4.246162 | 5.354516  | C | 10.235018 | -1.255310 | 2.489458  |
| C             | 1.766503  | -2.027487 | 6.504614  | C | 11.043874 | -2.342858 | 2.059837  |
| C             | 0.434008  | -1.877453 | 6.000773  | C | 7.276849  | 0.589021  | 4.899538  |



|   |           |           |            |   |           |           |            |
|---|-----------|-----------|------------|---|-----------|-----------|------------|
| C | 11.621959 | 7.008465  | -7.009130  | C | 5.813638  | 5.275010  | -9.563726  |
| C | 10.409534 | 7.757352  | -7.226369  | C | 0.491703  | 8.159608  | -4.081057  |
| C | 10.083670 | 8.841257  | -6.328008  | C | -0.376360 | 9.040569  | -4.835446  |
| C | 10.967113 | 9.103234  | -5.217634  | C | 0.169450  | 9.989121  | -5.693762  |
| C | 9.356567  | 7.182602  | -8.025089  | C | 3.541161  | 5.420801  | -10.590677 |
| C | 8.143849  | 7.930073  | -8.256053  | C | 2.584002  | 6.246655  | -11.285104 |
| C | 7.833415  | 9.040803  | -7.392605  | C | 2.632043  | 7.635750  | -11.177022 |
| C | 8.728853  | 9.336159  | -6.295987  | C | 15.736046 | 2.494776  | -4.647778  |
| C | 7.083835  | 7.339100  | -9.034384  | C | 17.056453 | 3.027758  | -4.615843  |
| C | 5.877227  | 8.088059  | -9.276968  | C | 10.085410 | 3.647769  | -7.137129  |
| C | 5.579536  | 9.219376  | -8.445489  | C | 7.784818  | 3.828448  | -8.048606  |
| C | 6.483501  | 9.547025  | -7.369764  | C | 8.724400  | 3.193104  | -7.156570  |
| C | 4.805853  | 7.496958  | -10.048080 | C | 5.487123  | 3.997975  | -8.993428  |
| C | 3.632944  | 8.273523  | -10.355962 | C | 6.420098  | 3.369046  | -8.092888  |
| C | 3.344538  | 9.442979  | -9.539238  | C | 3.188839  | 4.149909  | -9.971198  |
| C | 4.229610  | 9.739662  | -8.441824  | C | 4.104992  | 3.567191  | -9.025109  |
| C | 3.678019  | 10.228971 | -7.199344  | C | 13.851679 | 1.414602  | -3.422079  |
| C | 2.255016  | 10.439803 | -7.085698  | C | 15.266897 | 1.529491  | -3.640715  |
| C | 1.518523  | 10.564648 | -8.321983  | C | 8.251986  | 2.351987  | -6.079598  |
| C | 2.046035  | 10.073253 | -9.513527  | C | 5.921907  | 2.583770  | -6.993062  |
| C | 5.924863  | 9.993533  | -6.118367  | C | 6.803292  | 2.220929  | -5.901540  |
| C | 4.492969  | 10.136442 | -6.008220  | C | 3.594034  | 2.840265  | -7.887645  |
| C | 3.849315  | 9.784858  | -4.774992  | C | 4.498261  | 2.514418  | -6.805667  |
| C | 2.416794  | 9.594219  | -4.763239  | C | 2.172366  | 2.758087  | -7.678935  |
| C | 1.604528  | 10.138110 | -5.822410  | C | 1.337497  | 2.987791  | -8.831014  |
| C | 8.160379  | 9.737943  | -5.033200  | C | 1.835358  | 3.651967  | -9.952488  |
| C | 6.724895  | 9.873766  | -4.924287  | C | 13.359762 | 1.257607  | -2.073274  |
| C | 6.076193  | 9.470896  | -3.702158  | C | 14.281907 | 1.192473  | -0.970001  |
| C | 4.650805  | 9.250889  | -3.702382  | C | 15.643153 | 0.856534  | -1.295433  |
| C | 10.389360 | 9.459333  | -3.945308  | C | 16.121490 | 1.027767  | -2.596518  |
| C | 8.956137  | 9.585507  | -3.838782  | C | 11.963899 | 1.533704  | -1.820716  |
| C | 8.303898  | 9.135509  | -2.630455  | C | 6.281003  | 2.076960  | -4.593634  |
| C | 6.881054  | 8.903225  | -2.647540  | C | 4.000605  | 2.528383  | -5.464181  |
| C | 12.615079 | 9.157809  | -2.853704  | C | 4.931789  | 2.503445  | -4.370583  |
| C | 11.181482 | 9.267322  | -2.750691  | C | 1.676892  | 2.841619  | -6.307612  |
| C | 10.530248 | 8.770583  | -1.565353  | C | 2.634636  | 2.940344  | -5.237748  |
| C | 9.107206  | 8.533008  | -1.596343  | C | 11.612470 | 2.223567  | -0.617272  |
| C | 15.439881 | 8.571083  | -3.044689  | C | 12.655902 | 2.542825  | 0.333720   |
| C | 14.841253 | 8.834845  | -1.756366  | C | 13.905034 | 1.829429  | 0.288408   |
| C | 13.400449 | 8.924357  | -1.665886  | C | 9.318683  | 2.561567  | -1.533758  |
| C | 12.751029 | 8.388038  | -0.503667  | C | 10.355963 | 2.921387  | -0.588659  |
| C | 11.332525 | 8.141021  | -0.546059  | C | 7.000905  | 2.946029  | -2.393412  |
| C | 17.191097 | 7.161344  | -4.114205  | C | 8.062542  | 3.316424  | -1.533949  |
| C | 16.817278 | 8.148236  | -3.116079  | C | 4.657351  | 3.329381  | -3.212473  |
| C | 17.640366 | 8.429974  | -1.962632  | C | 5.788165  | 3.709848  | -2.381815  |
| C | 17.058628 | 8.660821  | -0.718332  | C | 2.353148  | 3.757846  | -4.081113  |
| C | 15.623367 | 8.640275  | -0.562127  | C | 3.455349  | 4.105431  | -3.197156  |
| C | 14.967206 | 8.058596  | 0.599367   | C | 1.117654  | 4.487891  | -4.025636  |
| C | 13.563621 | 7.748786  | 0.507931   | C | 0.055869  | 4.019007  | -4.877415  |
| C | 13.048660 | 6.564942  | 1.157388   | C | 0.323933  | 3.213045  | -5.986402  |
| C | 13.952149 | 5.697570  | 1.867774   | C | 12.573663 | 3.782343  | 1.068677   |
| C | 15.209758 | 6.271871  | 2.279257   | C | 13.721047 | 4.260733  | 1.796790   |
| C | 15.701282 | 7.424463  | 1.667853   | C | 14.758072 | 3.298078  | 2.076032   |
| C | 17.290144 | 4.405718  | -4.884387  | C | 14.853772 | 2.121033  | 1.333345   |
| C | 18.492023 | 5.087664  | -4.448180  | C | 10.302547 | 4.187111  | 0.096355   |
| C | 18.435359 | 6.422273  | -4.059765  | C | 11.477913 | 4.680113  | 0.769134   |
| C | 10.810959 | 6.980005  | 0.130674   | C | 8.047629  | 4.606139  | -0.881100  |
| C | 11.729435 | 6.093705  | 0.798273   | C | 9.230930  | 5.097072  | -0.218355  |
| C | 8.577236  | 7.396831  | -0.885650  | C | 5.779357  | 5.020369  | -1.780292  |
| C | 9.491997  | 6.511335  | -0.204781  | C | 6.977777  | 5.518555  | -1.167162  |
| C | 11.622397 | 5.588135  | -7.254824  | C | 3.473566  | 5.432186  | -2.629629  |
| C | 6.341517  | 7.801284  | -1.890873  | C | 4.701802  | 5.934364  | -2.073484  |
| C | 7.250062  | 6.938281  | -1.186133  | C | 1.146236  | 5.852934  | -3.476570  |
| C | 9.340384  | 5.754963  | -8.221026  | C | 2.415247  | 6.349419  | -2.975298  |
| C | 10.396946 | 4.957993  | -7.663611  | C | 0.142303  | 6.809123  | -3.800747  |
| C | 4.102354  | 8.186556  | -2.900361  | H | 0.466152  | 10.917110 | -8.309686  |
| C | 5.002543  | 7.341201  | -2.166210  | H | 1.398203  | 10.049556 | -10.414474 |
| C | 7.054304  | 5.906772  | -9.194569  | H | 16.729273 | 7.742623  | 1.914353   |
| C | 8.102659  | 5.117227  | -8.602866  | H | 17.714517 | 8.724356  | 0.174763   |
| C | 1.862556  | 8.577311  | -3.906408  | H | 19.331071 | 6.883790  | -3.594368  |
| C | 2.752771  | 7.738800  | -3.149583  | H | 18.742784 | 8.317436  | -2.024147  |
| C | 4.764421  | 6.058158  | -10.177791 | H | -0.507521 | 10.551639 | -6.369961  |

|   |           |          |            |   |           |           |           |
|---|-----------|----------|------------|---|-----------|-----------|-----------|
| H | 1.805249  | 8.233992 | -11.612727 | H | 5.909692  | -0.094653 | -3.463530 |
| H | 1.721172  | 5.781028 | -11.805269 | H | 5.528449  | 0.930482  | -2.048988 |
| H | 17.875986 | 2.453001 | -4.135799  | H | 9.703830  | -0.534439 | -4.236429 |
| H | 19.424090 | 4.504245 | -4.288981  | H | 7.942125  | -0.570227 | -4.604069 |
| H | 1.131140  | 3.924824 | -10.765415 | C | 6.983031  | -0.777630 | -0.508319 |
| H | 17.209921 | 0.909476 | -2.779102  | C | 7.844191  | -1.684638 | 0.150083  |
| H | 0.253173  | 2.754413 | -8.788029  | C | 8.992625  | -2.177895 | -0.511533 |
| H | 16.365609 | 0.607609 | -0.490623  | C | 9.297610  | -1.746012 | -1.823556 |
| H | -0.500338 | 2.991997 | -6.695918  | C | 8.432970  | -0.847573 | -2.489332 |
| H | 15.745556 | 1.474360 | 1.468729   | H | 6.078832  | -0.386390 | 0.006576  |
| H | -0.974370 | 4.410713 | -4.746564  | H | 7.619701  | -2.004531 | 1.189486  |
| H | 15.578123 | 3.551512 | 2.779663   | H | 9.663740  | -2.895877 | 0.005011  |
| H | -0.872727 | 6.470507 | -4.096065  | H | 10.215336 | -2.109568 | -2.335006 |
| H | 15.859743 | 5.729588 | 2.997157   |   |           |           |           |
| H | -1.472109 | 8.857114 | -4.836930  |   |           |           |           |



**S2:** Molecular models of optimized structures discussed in the text

1@(5,5), site a

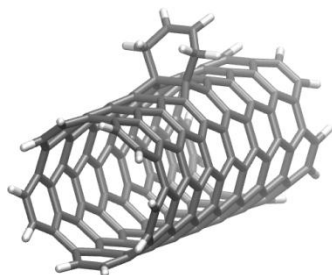

1@(5,5), site b

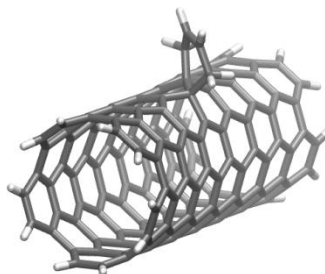

1@(9,0), site a

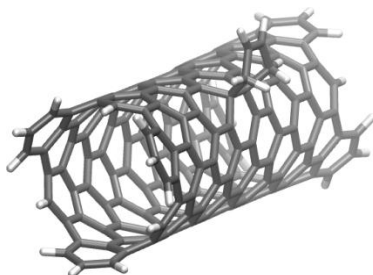

1@(9,0), site b

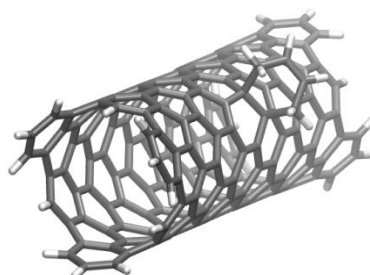

1@(6,5), site a

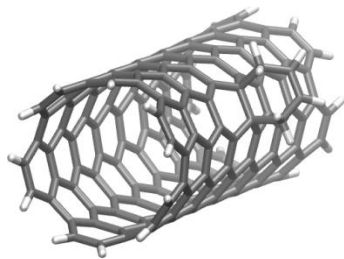

1@(6,5), site b

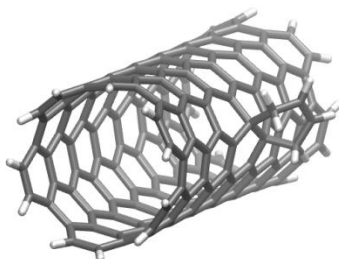

1@(6,5), site c

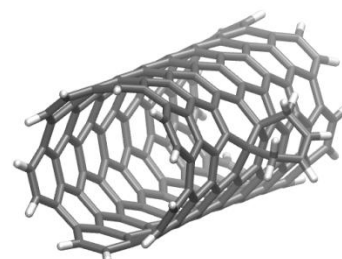

2@(5,5), site a

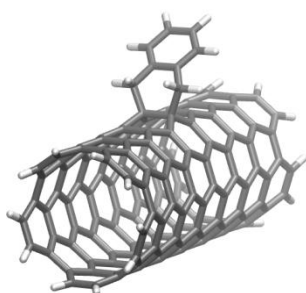

2@(9,0), site a

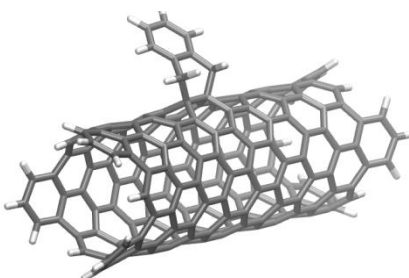

2@(6,5), site b

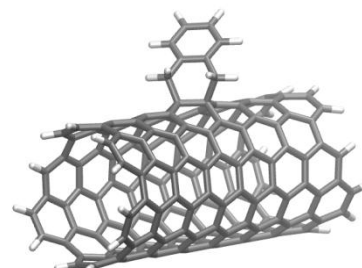

Supplement: b808152b.pdf [file b808152b.pdf]
